# Supplementary material
Source: PubMed Central journal article supplement (PMC6897314)

**Figure S1**

**A: miRNA Profiles**

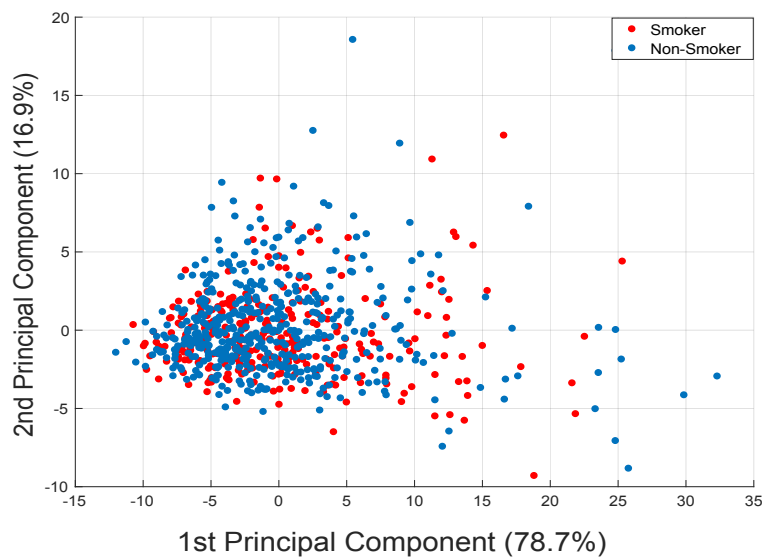

**B: Cytokine Profiles**

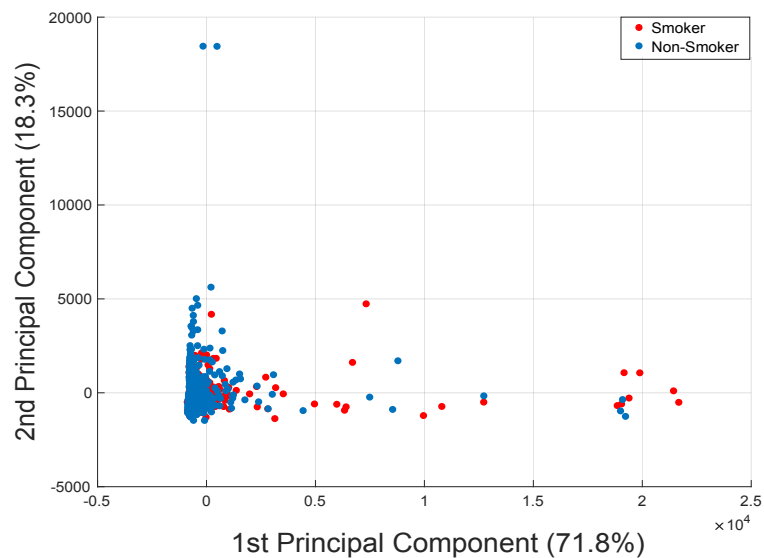

**C: Cardiovascular Profiles**

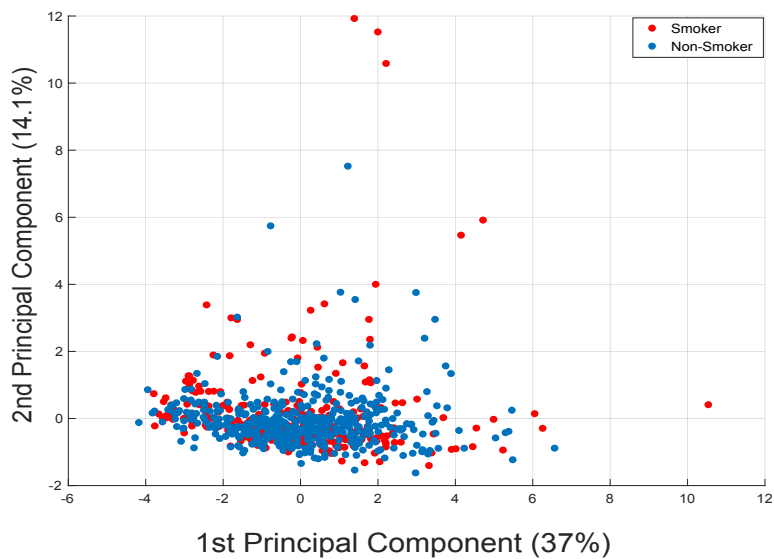

**D: Metabolic Profiles**

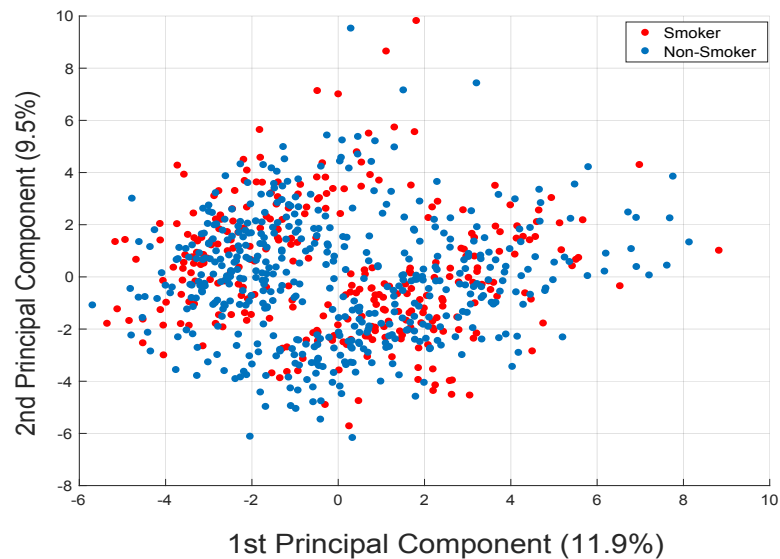

Supplement: NIHMS1536942-supplement-Figure_S1.pdf [file NIHMS1536942-supplement-Figure_S1.pdf]
